1  
2  
3  
4  
5  
6

# A stochastic model of adult neurogenesis coupling cell cycle progression and differentiation

Anna Stopka<sup>1, 2, \*</sup> and Marcelo Boareto<sup>1, 2</sup>

<sup>1</sup>Department of Biosystems Science and Engineering, ETH Zürich, Switzerland

<sup>2</sup>Swiss Institute of Bioinformatics, Switzerland

\*anna.stopka@bsse.ethz.ch

## 7 Abstract

8 Long-term tissue homeostasis requires a precise balance between stem cell self-renewal and the  
9 generation of differentiated progeny. Recently, it has been shown that in the adult murine brain,  
10 neural stem cells (NSCs) divide mostly symmetrically. This finding suggests that the required  
11 balance for tissue homeostasis is accomplished at the population level. However, it remains un-  
12 clear how this balance is enabled. Furthermore, there is experimental evidence that proneural  
13 differentiation factors not only promote differentiation, but also cell cycle progression, suggesting  
14 a link between the two processes in NSCs. To study the effect of such a link on NSC dynamics, we  
15 developed a stochastic model in which stem cells have an intrinsic probability to progress through  
16 cell cycle and to differentiate. Our results show that increasing heterogeneity in differentiation  
17 probabilities leads to a decreased probability of long-term tissue homeostasis, and that this effect  
18 can be compensated when cell cycle progression and differentiation are positively coupled. Using  
19 single-cell RNA-Seq profiling of adult NSCs, we found a positive correlation in the expression levels  
20 of cell cycle and differentiation markers. Our findings suggest that a coupling between cell cycle  
21 progression and differentiation on the cellular level is part of the process that maintains tissue  
22 homeostasis in the adult brain.

## 23 1 Introduction

24 It is now widely accepted that a precise balance of stem cell self-renewal and differentiation is  
25 required to maintain long term tissue homeostasis. There are two strategies to achieve this task:  
26 asymmetry on the cellular or on the population level [1, 2, 3]. In mammals, the applied home-  
27 ostatic strategies are different for every regenerating tissue, among which are the skin, intestine,  
28 lung, blood, bone marrow, heart, testis, uterus and mammary gland [4, 5, 6]. For instance, ap-  
29 proximately 85% of the stem cells in the skin divide asymmetrically [7], whereas stem cells in the  
30 intestine divide mostly symmetrically [8]. The mammalian brain also regenerates [9], whereas it  
31 remains unclear which homeostatic strategy is applied. For a long time, it has been thought that  
32 the strategy to maintain tissue homeostasis in the adult brain would rely on asymmetry on the  
33 cellular level [10]. This thinking is likely to have originated from the fact that during embryo neu-  
34 rogenesis, primary neural progenitors in the ventricular zone (VZ) divide mostly asymmetrically  
35 [11]. However, Obernier et al. have recently shown that stem cells in the adult brain divide mostly  
36 symmetrically [12]. This implies that for adult neurogenesis the strategy to maintain homeostasis  
37 is population asymmetry rather than asymmetry on the cellular level. Although the sustainment  
38 of adult organs via population asymmetry is a well-established concept and is found in other tis-  
39 sues, there are still many open questions. For example, how can a stable stem cell population be  
40 achieved when stem cells divide exclusively symmetrically?

41 Homeostasis via population asymmetry could, for instance, be achieved by limited access to a  
42 stem cell niche in combination with a short-range cell fate determining signal [2, 13]. Conversely,  
43 if the stem cell population asymmetry is based on an internal regulation that is either intrinsic  
44 or coupled to an extrinsic signaling, it is unknown what mechanisms could govern the process. Is  
45 a molecular regulator enabling a balanced stochastic cell fate decision for a stem cell population?  
46 Interestingly, an experimental study revealed a molecular link between cell cycle progression of neu-  
47 ral progenitors and neuronal differentiation through the proneural gene *Ascl1* [14]. Furthermore,  
48 recent results have shown that the transcription factor *Ato* in *Drosophila*, regulating the expression  
49 of *Ase*, the non-mammalian homolog of *Ascl1*, has a dual role in proliferation and differentiation  
50 of neural progenitors [15]. These findings suggest that the cell cycle progression and differentiation  
51 of embryonic NSCs are regulated in a coupled manner through the expression of proneural genes.  
52 At present it remains unclear, whether cell cycle progression and differentiation of adult NSCs is  
53 also regulated in a coupled manner, and, in addition to that, whether such a coupled regulation  
54 would have an effect on tissue homeostasis.

55 Over the years, a number of insightful studies on renewal dynamics of stem cells have been  
56 conducted, ranging from models on stem cell dynamics in general [16, 17, 18, 19, 20, 21, 22, 23]  
57 to brain specific models [24, 25, 26, 27, 28, 29, 30, 31, 32]. The latter were used to explore

58 specific characteristics of neurogenesis, such as the role of fate determining signaling factors during  
59 development [28], or the migration of neuroblast cells to the olfactory bulb in adults [26]. Other  
60 models explored the conditions for homeostasis without further specifying the studied regenerating  
61 tissue [17, 19, 20, 21, 22, 23]. For instance, the dynamics of mutant accumulation in homeostatic  
62 tissues over time has been explored, showing that type and number of mutants depend on the  
63 division-tree length [23]. Especially the role of feedback signals controlling the balance between  
64 stem cell self-renewal and differentiation was investigated. It was shown that homeostasis based on  
65 stochastic processes needs to be regulated by negative regulatory feedback loops [20]. Furthermore,  
66 it was found that, depending on the applied feedback network, symmetric stem cell divisions can  
67 both stabilize or destabilize the homeostatic state of a population [21].

68 In order to study how a coupling between cell cycle progression and differentiation on the single  
69 cell level affects homeostasis, we developed a model in which stem cells have an intrinsic probability  
70 to progress through cell cycle and to differentiate. In our model, stem cells divide symmetrically,  
71 representing for instance adult NSCs [12]. We chose a stochastic approach as it allows to study  
72 how fluctuations that emerge at the cellular level affect population dynamics. With our model, we  
73 investigated the dynamics of stem cell populations with uncoupled and coupled cell cycle activity  
74 and differentiation. We evaluated how robust populations are maintained and how many pre-  
75 differentiated cells are produced. Furthermore, we analyzed single-cell RNA-Seq data of adult  
76 NSCs for a qualitative comparison to our simulation results.

77 This paper is organized as follows. In Section 2 we define our model and discuss the biological  
78 background underlying our assumptions. In Section 3 we present the results of our simulations  
79 (Section 3.1 and 3.2) and the RNA-Seq profiling analysis (Section 3.3), offering biological interpre-  
80 tation of the results. In Section 4 we discuss our findings.

## 2 Methods

### 2.1 Modeling a stem cell

We developed a stochastic model of stem cell dynamics in which the fate of a stem cell is determined by its probability to progress through cell cycle within a time frame  $\Delta t$  and its probability to differentiate.

In our model, we assign each stem cell a factor  $\epsilon$ , where  $\epsilon$  corresponds to:

$$\begin{cases} \epsilon : & \text{probability to progress through cell cycle within } \Delta t, \\ (1 - \epsilon) : & \text{probability to not progress through cell cycle within } \Delta t, \end{cases} \quad (1)$$

with  $\epsilon \in [0, 1]$ . The cell cycle activity  $\epsilon$  is inverse proportional to the cell cycle time  $\tau_{cc}$  and given by  $\epsilon = \frac{\Delta t}{\tau_{cc}}$ . Further, each stem cell has a

$$\begin{cases} \alpha : & \text{probability to differentiate, and a} \\ (1 - \alpha) : & \text{probability to maintain stemness,} \end{cases} \quad (2)$$

with  $\alpha \in [0, 1]$ .

Recent findings revealed that the divisions of NSCs in adult mice are mostly symmetrical [12]. Our model mimics the dynamics of adult NSCs by allowing stem cells to divide only symmetrically, either into two stem cells (symmetric proliferative division) or into two pre-differentiated cells (symmetric differentiative division). If a stem cell does not progress through cell cycle, it remains unchanged while keeping its typical stem cell properties. The dynamics of a stem cell are described by a discrete-time Markov chain, where each iteration has a set of 3 states: symmetric proliferative division, symmetric differentiative division and no division. A graphical representation of one iteration is shown in Figure 1(a). The probability of differentiation and self-renewal are given by  $\epsilon\alpha$  and  $\epsilon(1 - \alpha)$ , respectively.

### 2.2 Modeling a stem cell population

Several factors can lead to inhomogeneous populations, e.g. the spatial distribution of stem cells or biomolecular signaling. Our model allows for extrinsic and intrinsic sources of heterogeneity by assigning an individual value pair of cell cycle activity and differentiation probability  $(\epsilon_k, \alpha_k)$  to every stem cell. In case of a symmetric proliferative division, the daughter cell does not inherit the properties of its mother cell, being in line with an experimental study that revealed independent cell cycle times between mother and daughter cells in the rat retina [33].

We investigated stem cell populations with uncoupled and coupled cell cycle and differentiation probabilities. The probabilities  $(\epsilon_k, \alpha_k)$  for every stem cell of a population were generated according to a multivariate normal distribution  $\mathbf{X} \sim \mathcal{N}_2(\mathbf{k}, \mathbf{\Sigma})$  with vector  $\mathbf{k} = (\mu_\epsilon \mu_\alpha)^\top$  and covariance matrix

$$\mathbf{\Sigma} = \begin{pmatrix} \sigma_\epsilon^2 & c\sigma_\epsilon\sigma_\alpha \\ c\sigma_\epsilon\sigma_\alpha & \sigma_\alpha^2 \end{pmatrix}. \quad (3)$$

The mean values  $\mu_\epsilon, \mu_\alpha$  and standard deviations  $\sigma_\epsilon, \sigma_\alpha$  determine the normal distribution of cell cycle activities and differentiation probabilities, respectively. The correlation coefficient  $c \in [-1, 1]$  defines the type of coupling between cell cycle activity and differentiation.

For our simulations, we assumed average cell cycle times of  $\tau_{cc} \simeq 20h$ , which is close to measured cell cycle times for stem cells in the ventricular-subventricular zone (V-SVZ) of the adult mammalian brain [34]. We chose a time step of  $\Delta t = 1h$ . Figure 1(b) shows an exemplary histogram of cell cycle activities  $\{\epsilon\}$  and the corresponding histogram of cell cycle times  $\{\tau_{cc}\}$ . We chose  $\sigma_\epsilon$  such that the resulting distribution of the cell cycle times  $\{\tau_{cc}\}$  resembles experimental measurements [33, 35]. Consequently, about 90% of all stem cells have a cell cycle time of  $(20 \pm 10)h$ , while the remaining ones are slow cycling stem cells that accumulate over time.

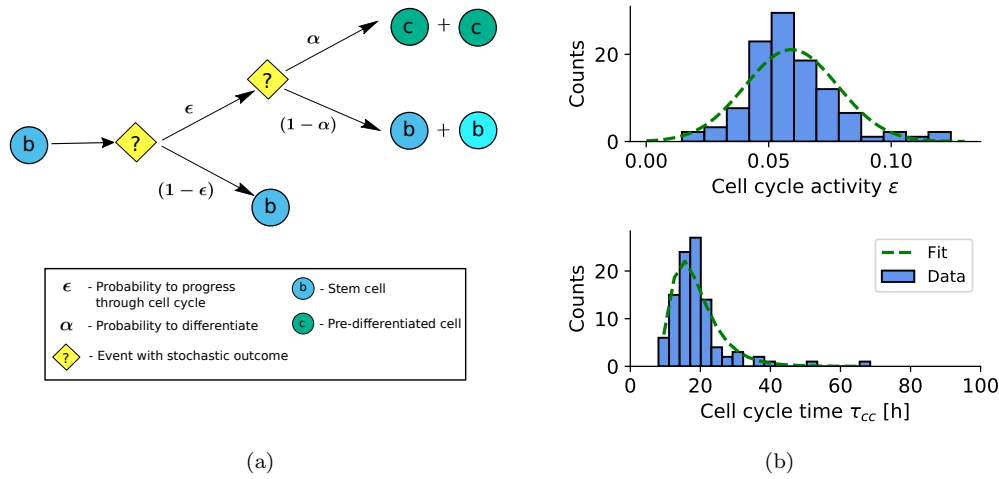

Figure 1: (a) *Schematic representation of one iteration step.* The probability of differentiation and self-renewal are given by  $\epsilon\alpha$  and  $\epsilon(1 - \alpha)$ , respectively. (b) *Exemplary histogram of cell cycle activities  $\{\epsilon\}$  and corresponding histogram of cell cycle times  $\{\tau_{cc}\}$ , with normal and log-normal fit, respectively.*

120 To study the dynamics of a stem cell population in a tissue, we summed over all stem cells at  
 121 each iteration step to track the stem cell population size. The expected net change of the stem cell  
 122 population  $B$  after one time step is given by

$$\Delta B = B_{t+1} - B_t = \sum_{k=1}^{B_t} \epsilon_k \cdot (1 - 2\alpha_k), \quad (4)$$

123 where  $B_t$  is the number of stem cells before the iteration step. For homeostasis, we assumed the  
 124 stem cell population to be constant in size:

$$\langle \epsilon_k (1 - 2\alpha_k) \rangle_{k,t} = 0. \quad (5)$$

125 For all relevant parameter areas in our study, the differences in the solution for  $\langle \alpha_k \rangle_k = \mu_\alpha$  between  
 126 the statistically dependent and independent case, are negligible. Thus, we solve  $\langle \epsilon_k \rangle_k \cdot \langle 1 - 2\alpha_k \rangle_k = 0$   
 127 to determine  $\mu_\alpha$  for the homeostatic case. The non-trivial solution is  $\mu_\alpha = 0.5$ , which implies that  
 128 the stem cells are on average as likely to maintain stemness as to differentiate. We analyzed the  
 129 average stem cell population dynamics for the non-homeostatic cases and found that a deviation  
 130 from the homeostatic conditions ( $\mu_\alpha \neq 0.5$  and  $\mu_\epsilon > 0$ ) leads to a measurable change in the stem  
 131 cell population size within approximately two days (Section A.1).

132 To evaluate and compare our simulations, we analyzed the number of differentiated daughter  
 133 cells and the probability to maintain a stem cell population (robustness). We defined the differen-  
 134 tiation rate  $D$  as the number of pre-differentiated cells  $C$  that were generated on average per time  
 135 step, normalized by the initial stem cell population size  $B_0$ :

$$D = \frac{C_{t_{end}}}{t_{end} \cdot B_0}, \quad (6)$$

136 with  $t_{end}$  being the simulation time. We simulated the stem cell population dynamics for different  
 137  $t_{end}$  and we set  $B_0 = 50$ . For every  $t_{end}$ , we simulated  $n = 300$  populations and evaluated how  
 138 many stem cell populations  $\tilde{n}$  could maintain their size, i.e. were neither lost ( $B_{t_{end}} = 0$ ) nor did  
 139 overgrow ( $B_{t_{end}} \geq 2B_0$ ) within the given time period  $t_{end}$ . We calculated the robustness  $R$  as  
 140 follows:

$$R = \frac{\tilde{n}}{n}. \quad (7)$$

## 141 2.3 Analysis of single-cell RNA-Seq data

142 We analyzed public single-cell RNA-Seq data of adult NSCs [36] for a qualitative comparison to  
 143 our simulation results. From the RNA-Seq data, we extracted cell cycle and differentiation marker  
 144 expression levels, which we related to the cell cycle activity  $\epsilon$  and differentiation probability  $\alpha$  in  
 145 our model. The goal of this analysis was, to extract information on the coupling between cell cycle  
 146 activity and differentiation of adult NSCs.

147 For our analysis, we plotted the expression levels of cell cycle markers (*Mki67*, *Mcm2*, *Ccnd1*  
 148 [36, 37, 38]) and differentiation markers (*Ascl1*, *Neurog2*, *Neurod2* [34, 39, 40]) on a  $\log_2$  scale  
 149 against each other, excluding data points with zero expression for both marker types. We then  
 150 computed the Pearson correlation coefficient (PCC) and did a bootstrapping analysis to evaluate  
 151 the accuracy of the determined PCC.

## 152 3 Results

### 153 3.1 Uncoupled cell cycle progression and differentiation

154 First, we studied the dynamics of stem cell populations with uncoupled cell cycle activity and  
 155 differentiation. To do so, we generated probabilities as described in Section 2.2 with various  
 156  $\sigma_\alpha$  and  $c = 0$ . Two exemplary distributions are shown in Figure 2(a) and further exemplary  
 157 distributions are shown in Figure A.2. We simulated the dynamics of two stem cell population types  
 158 with distinct differentiation heterogeneity levels ( $\sigma_\alpha = 0.02, \sigma_\alpha = 0.08$ ) for different simulation  
 159 times  $t_{end}$ . We found that for both population types the average differentiation rates  $D$  are not  
 160 significantly changing for different simulation times, while a population with higher differentiation  
 161 heterogeneity tends to generate more differentiated progeny (Figure 2(b), top). Evaluating the  
 162 robustness  $R$ , we observed that for both differentiation heterogeneity levels, the probability to  
 163 maintain a population decreases for increasing simulation times (Figure 2(b), bottom). Although  
 164 the robustness of populations with lower differentiation heterogeneity decreases significantly slower,  
 165 there is no life-long homeostasis for a population with uncoupled cell cycle and differentiation  
 166 activities.

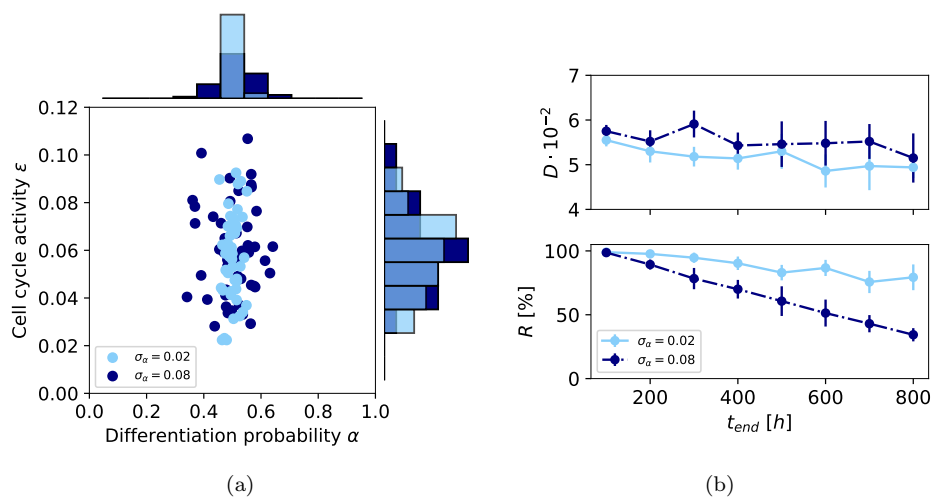

Figure 2: (a) Two exemplary stem cell populations with uncoupled cell cycle and differentiation and distinct differentiation heterogeneity levels. The histograms show an overlay of cell cycle activity and differentiation probability distributions, respectively, where the bars for  $\sigma_\alpha = 0.02$  are transparent. (b) Average differentiation rates  $D$  (top) and average robustness  $R$  (bottom) of two stem cell population types with uncoupled cell cycle and differentiation for different simulation times  $t_{end}$ . The level of heterogeneity affects the probability for maintaining homeostasis significantly, while the production of differentiated progeny is not affected.

167 Focusing on long-term simulations ( $t_{end} = 800h \simeq$  one month), we observed that the level of  
 168 heterogeneity in the differentiation probabilities has a strong impact on homeostasis: the higher  
 169 the differentiation heterogeneity level, the lower the probability to maintain a stem cell population  
 170 (Figure 3(a)). Furthermore, the probability for overgrowth among the unstable cases increases  
 171 from around 50% for  $\sigma_\alpha = 0$  to 100% for  $\sigma_\alpha = 0.12$ . Both results are likely to be caused by  
 172 the dynamics of stem cells that have a high cell cycle activity and are more likely to maintain  
 173 stemness: these cells cause a stem cell population to (over-)grow and their number increases  
 174 with increasing differentiation heterogeneity. Moreover, the long-term simulations revealed that  
 175 the differentiation rates  $D$  of populations with a robustness  $\geq 10\%$  do not significantly change  
 176 for various differentiation heterogeneity levels (Figure 3(b)). However, stem cell populations with  
 177 heterogeneous differentiation probabilities tend to be larger and thus have on average slightly higher  
 178 differentiation rates than stem cell populations with homogeneous differentiation probabilities.

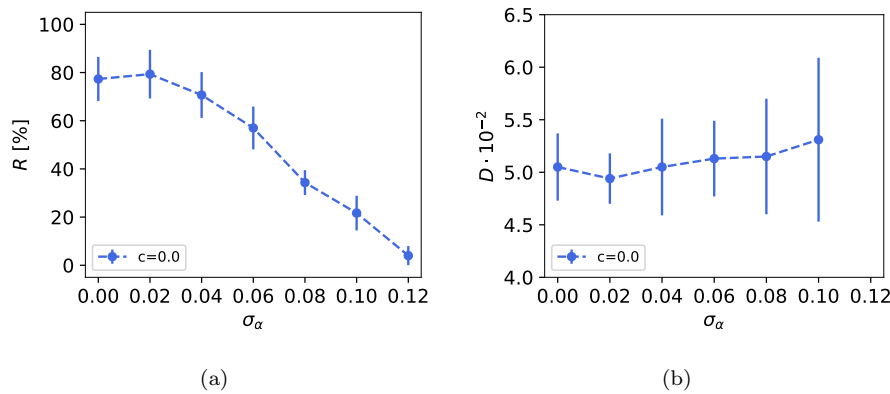

Figure 3: Long-term ( $t_{end} = 800h$ ) robustness and differentiation rates of stem cell populations with uncoupled cell cycle and differentiation for various  $\sigma_\alpha$ . (a) The higher  $\sigma_\alpha$ , the lower the probability for a population to be maintained. (b) The level of heterogeneity in the differentiation probabilities does not affect the differentiation rates significantly. More heterogeneous differentiation probabilities induce the generation of more differentiated progeny.

### 179 3.2 Coupled cell cycle progression and differentiation

180 Having analyzed uncoupled stem cell populations, we investigated stem cell populations with cou-  
 181 pled cell cycle and differentiation activities. Again, we generated probabilities as described in  
 182 Section 2.2 with various  $\sigma_\alpha$  and  $c \neq 0$ . Two exemplary distributions are shown in Figure 4(a) and  
 183 further exemplary distributions are shown in Figure A.2. We studied the dynamics of stem cell  
 184 populations with coupled cell cycle and differentiation activities and  $\sigma_\alpha = 0.08$ . We found that  
 185 for all simulation times, a negative coupling results in significantly higher average differentiation  
 186 rates  $D$  than a positive coupling (Figure 4(b), top). Evaluating the robustness  $R$ , we observed  
 187 that for both, populations with positive and negative coupling, the probability to be maintained in  
 188 the long term is lower than in the short term (Figure 4(b), bottom). The probability to maintain  
 189 homeostasis decreases significantly slower for populations with a positive coupling than for popu-  
 190 lations with a negative coupling. However, there is no life-long homeostasis for a population with  
 191 coupled cell cycle and differentiation activities.

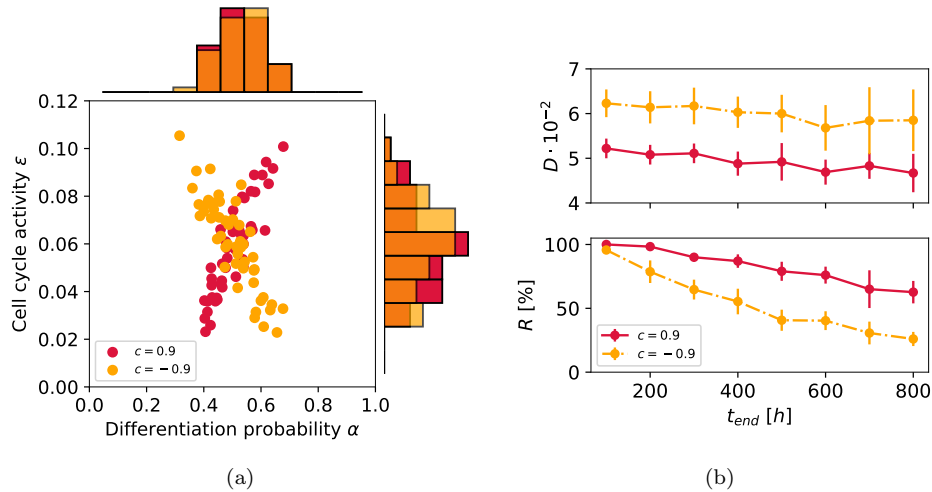

Figure 4: (a) *Two exemplary coupled stem cell populations with positive and negative correlation. The histograms show an overlay of cell cycle activity and differentiation probability distributions, respectively, where the bars for  $c = -0.9$  are transparent.* (b) *Average differentiation rates  $D$  (top) and average robustness  $R$  (bottom) of two coupled stem cell population types for different simulation times  $t_{end}$ . A negative coupling increases differentiation rates, while a positive coupling increases the probability for maintaining homeostasis.*

192 Focusing on long-term simulations ( $t_{end} = 800h \simeq$  one month), we observed that the type of  
 193 coupling between cell cycle activity and differentiation has a strong impact on homeostasis. A  
 194 positive correlation increases the probability for a tissue to be maintained in the long term (Figure  
 195 5(a)) and decreases its average differentiation rates  $D$  (Figure 5(b)). In contrast, a negative  
 196 correlation decreases the probability for a tissue to be maintained in the long term. At the same  
 197 time, it results in the highest average differentiation rates  $D$  for stem cell populations with a  
 198 robustness  $\geq 10\%$ . Furthermore, we found that the probability for overgrowth among the unstable  
 199 cases merely depends on the differentiation heterogeneity level and is independent of the coupling  
 200 type. Stem cell populations with a coupling between cell cycle activity and differentiation mainly  
 201 consist of two subpopulations: slow dividing stem cells and fast dividing stem cells, which are  
 202 either more likely to maintain stemness or more likely to differentiate. For populations with a  
 203 negative coupling, the slow dividing stem cells are more likely to differentiate and the fast dividing  
 204 stem cells are more likely to maintain stemness, which causes populations to (over-)grow. At the  
 205 same time, because these stem cell populations are larger, they enable the generation of more  
 206 pre-differentiated progeny compared to populations with a positive coupling. For populations with  
 207 a positive coupling, the fast dividing stem cells are more likely to differentiate, while the cells that  
 208 are more likely to maintain stemness divide slowly, which enables robustness of a population in  
 209 the long term.



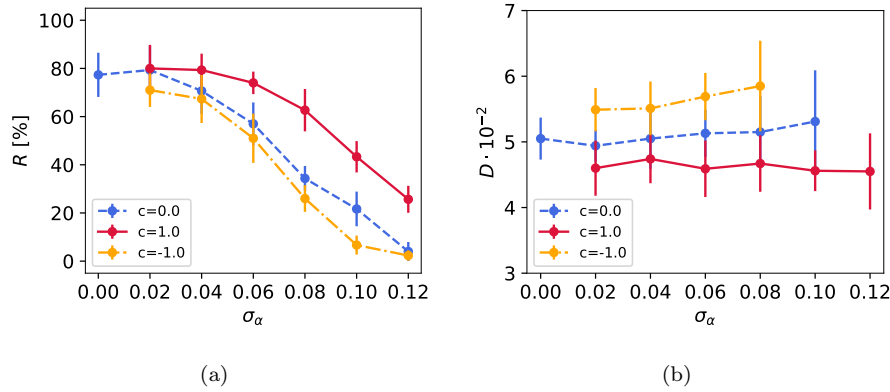

Figure 5: Long-term ( $t_{end} = 800h$ ) robustness and differentiation rates of stem cell populations with coupled cell cycle and differentiation for various  $\sigma_\alpha$ . (a) A positive coupling increases the probability for maintaining homeostasis. (b) A negative coupling increases differentiation rates, while a positive coupling lowers them.

### 210 3.3 Single-cell RNA-Seq data of adult murine NSCs

211 In our simulations, we observed the most robust stem cell populations for a positive correlation  
 212 between cell cycle activity and differentiation (Figure 5(a)). We also found a positive correlation  
 213 between cell cycle and differentiation marker expression levels in the adult murine SVZ (Figure  
 214 6(a)). This finding indicates that an adult NSC population is likely to prioritize its robust main-  
 215 tenance rather than a high amount of differentiated progeny. We saw this positive correlation  
 216 confirmed when we analyzed the subpopulation of stem cells which have non-zero expression levels  
 217 in both, cell cycle and differentiation markers (A.3).

218 An underlying mechanism for a coupling of cell cycle and differentiation on the molecular level  
 219 could be driven by proneural genes regulating both processes in a coupled manner (Figure 6(b)).  
 220 Determining which molecular players might be involved in such a regulation will require further  
 221 experimental investigation.

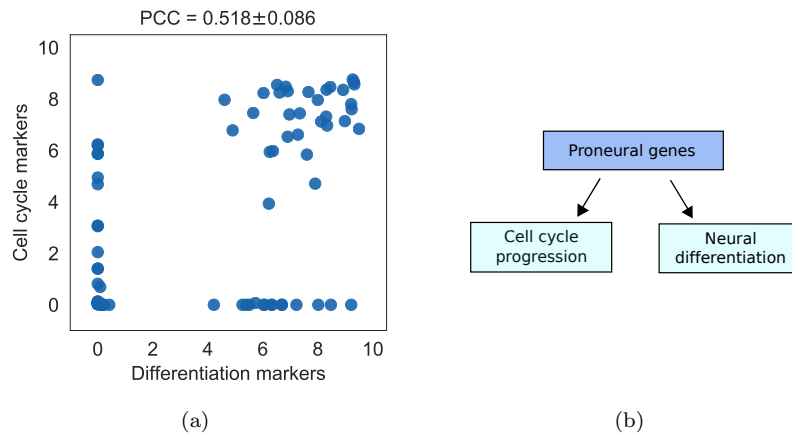

Figure 6: (a) Analysis of single-cell RNA-Seq data of adult mouse NSCs [36] reveals a positive correlation between cell cycle and differentiation marker expression levels. (b) Schematic representation of a possible underlying molecular mechanism of a coupled regulation of cell cycle progression and differentiation.

## 222 4 Discussion

223 Homeostasis is an important mechanism for the sustainment of adult tissues during life. Various  
224 organs regenerate via tissue homeostasis, and there is evidence that also complex organs like the  
225 brain make use of it. Here, we presented a stochastic model to study stem cell dynamics in the  
226 adult brain. We focused on the interplay between cell cycle activity and differentiation on the  
227 cellular level and its impact on stem cell population dynamics. We also analyzed single-cell RNA-  
228 Seq data of adult NSCs for a qualitative comparison to our simulation results. In the following,  
229 we present and discuss the main findings of this study.

230 Our simulations showed that the probability to maintain homeostasis decreases with increasing  
231 differentiation heterogeneity. Furthermore, we found that a coupling of cell cycle and differentiation  
232 has an effect on stem cell population dynamics, and, depending on whether the coupling is positive  
233 or negative, increases or decreases the robustness of homeostasis in an adult tissue, respectively. A  
234 coupling between cell cycle activity and differentiation leads to the generation of two subpopulations  
235 within a stem cell population. There are slow dividing and fast dividing stem cells, which are either  
236 more likely to maintain stemness or more likely to differentiate. In a population with a positive  
237 coupling, the fast dividing stem cells are more likely to differentiate and the slow dividing stem  
238 cells are more likely to maintain stemness. This combination leads to an increase in the typical  
239 lifetime of a stem cell pool. How subpopulations within a stem cell population could be generated  
240 remains unclear. For instance, limited access to a stem cell niche in combination with a short range  
241 signal can possibly generate two or more subpopulations of stem cells.

242 Although a positive coupling between cell cycle and differentiation leads to a significantly higher  
243 long-term robustness for heterogeneous differentiation probabilities, it is also advantageous for a  
244 stem cell population to keep the heterogeneity level of differentiation low. Based on our theoretical  
245 analysis, we cannot conclude which of these scenarios is probably the case in the adult brain. Other  
246 studies report heterogeneous gene expression amongst stem cells within a population, suggesting the  
247 existence of differentiation heterogeneity within a NSC population. For instance, there is evidence  
248 for heterogeneity in gene expression among hematopoietic stem cells [41, 42, 43]. Furthermore,  
249 heterogeneity among the NSCs in the mammalian brain prevails in terms of proliferation dynamics  
250 and regional identity [44]. A central question is, whether the heterogeneity is a reflection of intrinsic  
251 differences of NSCs or is caused by an external signal [10].

252 Single-cell RNA-Seq is a powerful method to compare gene expression levels of cells within a  
253 population. Our qualitative analysis of single-cell RNA-Seq data of adult NSCs showed a positive  
254 correlation between the expression of cell cycle markers and differentiation markers, indicating that  
255 cell cycle activity and differentiation are indeed coupled. As RNA-Seq data has several limitations,  
256 such as providing a snapshot of gene expression in time and allowing for a relative quantification  
257 of gene expression levels only, we can neither conclude that the differentiation probabilities are  
258 heterogeneous and positively coupled nor that they are rather homogeneous. Nonetheless, the  
259 idea that both, cell cycle progression and differentiation, are controlled by the same molecular  
260 players could explain a positive correlation between these two key components of homeostasis.  
261 The proneural gene *Ascl1*, associated with differentiation of neuronal progenitor cells [14], could  
262 be part of a molecular network that regulates cell cycle progression and differentiation of NSCs in  
263 a coupled manner. The existence and the details of such a regulating network will require further  
264 experimental investigation, as well as the identification of additional molecular players.

265 In this study, our focus was on exploring the effect of a coupled internal regulation of cell cycle  
266 activity and differentiation on stem cell population dynamics. Explicit regulating factors are not  
267 part of our model, as they were intensively explored in former studies [17, 21]. As there is no  
268 long-term homeostasis without external control, we propose that feedback signaling among the  
269 stem cells or signaling from the stem cell niche are the building blocks to maintain a stem cell  
270 population. In addition, a coupling of cell cycle activity and differentiation of stem cells gives a  
271 stem cell population an internal robustness and is thus likely to be part of a homeostatic strategy.  
272 Furthermore, a certain, if only small, amount of adult NSCs dividing asymmetrically can further  
273 increase the stability of homeostasis, as well as stem cell quiescence.

274 If the balance between stem cell self-renewal and differentiation gets out of equilibrium, the

275 stem cell population suffers overgrowth or depletion of the stem cell population, resulting in fatal  
276 consequences for the organ such as tumorigenesis [3, 45, 46]. Our simulation results have shown  
277 that a stem cell population whose cell cycle activity and differentiation are negatively correlated is  
278 rather unstable: it tends to overgrow, while producing many differentiated cells at the same time.  
279 This results in the question whether in case of disease, a regulating molecular mechanism might  
280 possibly be altered and adopt a state that is similar to the negatively coupled one. In summary, in  
281 terms of neurogenesis and neural diseases related to tissue overgrowth, the molecular link between  
282 cell cycle progression and differentiation in NSCs is worthwhile to study further.

## 283 **Materials**

### 284 **Code Availability**

285 For simulations and data analysis we used Python programming language (Python Software Foun-  
286 dation, <https://www.python.org/>).  
287 Our code is available on <https://github.com/astopka/StochasticModelNSC.git>.

### 288 **Data Availability**

289 For the analysis of single-cell RNA-Seq data we used the public dataset from [36] and the processed  
290 data was downloaded from <https://www.ncbi.nlm.nih.gov/geo/query/acc.cgi?acc=GSE67833>.

## 291 **Acknowledgements**

292 This research did not receive any specific grant from funding agencies in the public, commercial,  
293 or not-for-profit sectors.

## References

- 294  
295 [1] Simons BD, Clevers H. Strategies for homeostatic stem cell self-renewal in adult tissues. *Cell*.  
296 2011;145(6):851–862. doi:10.1016/j.cell.2011.05.033.
- 297 [2] Watt FM, Hogan BLM. Out of Eden: Stem Cells and Their Niches. *Science*.  
298 2000;287(5457):1427–1430. doi:10.1126/science.287.5457.1427.
- 299 [3] Morrison SJ, Kimble J. Asymmetric and symmetric stem-cell divisions in development and  
300 cancer. *Nature*. 2006;441(7097):1068–1074. doi:10.1038/nature04956.
- 301 [4] Pellettieri J, Alvarado AS. Cell Turnover and Adult Tissue Homeostasis:  
302 From Humans to Planarians. *Annual Review of Genetics*. 2007;41(1):83–105.  
303 doi:10.1146/annurev.genet.41.110306.130244.
- 304 [5] Blanpain C, Horsley V, Fuchs E. Epithelial Stem Cells: Turning over New Leaves. *Cell*.  
305 2007;128(3):445–458. doi:10.1016/j.cell.2007.01.014.
- 306 [6] Anversa P, Kajstura J, Leri A, Bolli R. Life and death of cardiac stem  
307 cells: A paradigm shift in cardiac biology. *Circulation*. 2006;113(11):1451–1463.  
308 doi:10.1161/CIRCULATIONAHA.105.595181.
- 309 [7] Lechler T, Fuchs E. Asymmetric cell divisions promote stratification and differentiation of  
310 mammalian skin. *Nature*. 2005;437(7056):275–280. doi:10.1038/nature03922.
- 311 [8] Snippert HJ, van der Flier LG, Sato T, van Es JH, van den Born M, Kroon-Veenboer C, et al.  
312 Intestinal crypt homeostasis results from neutral competition between symmetrically dividing  
313 Lgr5 stem cells. *Cell*. 2010;143(1):134–144. doi:10.1016/j.cell.2010.09.016.
- 314 [9] Ming GL, Song H. Adult Neurogenesis in the Mammalian Brain: Significant Answers and  
315 Significant Questions. *Neuron*. 2011;70(4):687–702. doi:10.1016/j.neuron.2011.05.001.
- 316 [10] Silva-Vargas V, Delgado AC, Doetsch F. Symmetric Stem Cell Division at the Heart of Adult  
317 Neurogenesis. *Neuron*. 2018;98(2):246–248. doi:10.1016/j.neuron.2018.04.005.
- 318 [11] Noctor SC, Martinez-Cerdeño V, Ivic L, Kriegstein AR. Cortical neurons arise in symmetric  
319 and asymmetric division zones and migrate through specific phases. *Nature Neuroscience*.  
320 2004;7(2):136–144. doi:10.1038/nn1172.
- 321 [12] Obernier K, Cebrian-Silla A, Thomson M, Parraguez JI, Anderson R, Guinto C, et al. Adult  
322 Neurogenesis Is Sustained by Symmetric Self-Renewal and Differentiation. *Cell Stem Cell*.  
323 2018;22(2):221–234.e8. doi:10.1016/j.stem.2018.01.003.
- 324 [13] Suh H, Deng W, Gage FH. Signaling in adult neurogenesis. *Annu Rev Cell Dev Biol*. 2010;p.  
325 416–423. doi:10.1016/j.conb.2010.04.010.
- 326 [14] Castro DS, Martynoga B, Parras C, Ramesh V, Pacary E, Johnston C, et al. A novel function  
327 of the proneural factor *Ascl1* in progenitor proliferation identified by genome-wide character-  
328 ization of its targets. *Genes and Development*. 2011;25(9):930–945. doi:10.1101/gad.627811.
- 329 [15] Mora N, Oliva C, Fiers M, Ejsmont R, Soldano A, Zhang TT, et al. A Temporal Transcriptional  
330 Switch Governs Stem Cell Division, Neuronal Numbers, and Maintenance of Differentiation.  
331 *Developmental Cell*. 2018;45(1):53–66.e5. doi:10.1016/j.devcel.2018.02.023.
- 332 [16] Stiehl T, Marciniak-Czochra A. Characterization of stem cells using mathematical models  
333 of multistage cell lineages. *Mathematical and Computer Modelling*. 2011;53(7-8):1505–1517.  
334 doi:10.1016/j.mcm.2010.03.057.
- 335 [17] Sun Z, Komarova NL. Stochastic modeling of stem-cell dynamics with control. *Mathematical*  
336 *Biosciences*. 2012;240(2):231–240. doi:10.1016/j.mbs.2012.08.004.

- 337 [18] Wu J, Rostami MR, Tzanakakis ES. Stem cell modeling: From gene networks  
338 to cell populations. *Current Opinion in Chemical Engineering*. 2013;2(1):17–25.  
339 doi:10.1016/j.coche.2013.01.001.
- 340 [19] Paździorek PR. Mathematical Model of Stem Cell Differentiation and Tissue Regen-  
341 eration with Stochastic Noise. *Bulletin of Mathematical Biology*. 2014;76(7):1642–1669.  
342 doi:10.1007/s11538-014-9971-5.
- 343 [20] Sun Z, Komarova NL. Stochastic control of proliferation and differentiation in stem cell  
344 dynamics. *Journal of Mathematical Biology*. 2015;71(4):883–901. doi:10.1007/s00285-014-  
345 0835-2.
- 346 [21] Yang J, Plikus MV, Komarova NL. The Role of Symmetric Stem Cell Di-  
347 visions in Tissue Homeostasis. *PLoS Computational Biology*. 2015;11(12):1–30.  
348 doi:10.1371/journal.pcbi.1004629.
- 349 [22] Greulich P, Simons BD. Dynamic heterogeneity as a strategy of stem cell self-  
350 renewal. *Proceedings of the National Academy of Sciences*. 2016;113(27):7509–7514.  
351 doi:10.1073/pnas.1602779113.
- 352 [23] Alvarado C, Fider NA, Wearing HJ, Komarova NL. Optimizing homeostatic  
353 cell renewal in hierarchical tissues. *PLoS Computational Biology*. 2018;14(2):1–24.  
354 doi:10.1371/journal.pcbi.1005967.
- 355 [24] Gohlke JM, Griffith WC, Faustman EM. Computational models of neocortical neuronogenesis  
356 and programmed cell death in the developing mouse, monkey, and human. *Cerebral Cortex*.  
357 2018;17(10):2433–2442. doi:10.1093/cercor/bhl151.
- 358 [25] Aimone JB, Wiskott L. Computational modeling of adult neurogenesis. *Adult Neurogenesis*.  
359 2008;p. 463–483. doi:10.1101/cshperspect.a018960.
- 360 [26] Ashbourn JMA, Miller JJ, Reumers V, Baekelandt V, Geris L, Interface JRS. A mathe-  
361 matical model of adult subventricular neurogenesis. *Journal of the Royal Society Interface*.  
362 2012;(May):2414–2423. doi:10.1098/rsif.2012.0193.
- 363 [27] Shahriyari L, Komarova NL. Symmetric vs. asymmetric stem cell divisions: an adaptation  
364 against cancer? *PloS one*. 2013;8(10). doi:10.1371/journal.pone.0076195.
- 365 [28] Barton A, Fendrik AJ, Rotondo E. A stochastic model of neurogenesis controlled by a single  
366 factor. *Journal of Theoretical Biology*. 2014;355:77–82. doi:10.1016/j.jtbi.2014.03.038.
- 367 [29] Ziebell F, Martin-Villalba A, Marciniak-Czochra A. Mathematical modelling of  
368 adult hippocampal neurogenesis: effects of altered stem cell dynamics on cell  
369 counts and bromodeoxyuridine-labelled cells. *Journal of The Royal Society Interface*.  
370 2014;11(94):20140144–20140144. doi:10.1098/rsif.2014.0144.
- 371 [30] Stumpf PS, Smith RCG, Lenz M, Schuppert A, Müller FJ, Babbie A, et al. Stem Cell  
372 Differentiation as a Non-Markov Stochastic Process. *Cell Systems*. 2017;5(3):268–282.e7.  
373 doi:10.1016/j.cels.2017.08.009.
- 374 [31] Picco N, García-Moreno F, Maini PK, Woolley TE, Molnár, Zoltán. Mathematical Modeling  
375 of Cortical Neurogenesis Reveals that the Founder Population does not Necessarily Scale with  
376 Neurogenic Output. *Cerebral Cortex*. 2018;(May):3–5. doi:10.1093/cercor/bhy068.
- 377 [32] Ziebell F, Dehler S, Martin-Villalba A, Marciniak-Czochra A. Revealing age-related  
378 changes of adult hippocampal neurogenesis using mathematical models. *Development*.  
379 2018;145(1):dev153544. doi:10.1242/dev.153544.

- 380 [33] Gomes FLAF, Zhang G, Carbonell F, Correa JA, Harris WA, Simons BD, et al. Reconstruction  
381 of rat retinal progenitor cell lineages in vitro reveals a surprising degree of stochasticity in cell  
382 fate decisions. *Development*. 2011;138(2):227–235. doi:10.1242/dev.059683.
- 383 [34] Ponti G, Obernier K, Guinto C, Jose L, Bonfanti L, Alvarez-Buylla A. Cell cycle  
384 and lineage progression of neural progenitors in the ventricular-subventricular zones of  
385 adult mice. *Proceedings of the National Academy of Sciences*. 2013;110(11):E1045–E1054.  
386 doi:10.1073/pnas.1219563110.
- 387 [35] Yates CA, Ford MJ, Mort RL. A Multi-stage Representation of Cell Proliferation as a Markov  
388 Process. *Bulletin of Mathematical Biology*. 2017;79(12):2905–2928. doi:10.1007/s11538-017-  
389 0356-4.
- 390 [36] Llorens-Bobadilla E, Zhao S, Baser A, Saiz-Castro G, Zwadlo K, Martin-Villalba A. Single-Cell  
391 Transcriptomics Reveals a Population of Dormant Neural Stem Cells that Become Activated  
392 upon Brain Injury. *Cell Stem Cell*. 2015;17(3):329–340. doi:10.1016/j.stem.2015.07.002.
- 393 [37] Kelly TJ, Brown GW. Regulation of Chromosome Replication. *Annu Rev Biochem*.  
394 2000;69:829–80. doi:10.1146/annurev.biochem.69.1.829.
- 395 [38] Baldin V, Lukas J, Marcote MJ, Pagano M, Draetta G. Cyclin D 1 is a nuclear protein required  
396 for cell cycle progression in G1. *Genes & Dev*. 1993;(7):812–821. doi:10.1101/gad.7.5.812.
- 397 [39] Kele J, Simplicio N, Ferri ALM, Mira H, Guillemot F, Arenas E, et al. Neurogenin 2 is required  
398 for the development of ventral midbrain dopaminergic neurons. *Development*. 2004;8:495–505.  
399 doi:10.1242/dev.02223.
- 400 [40] Messmer K, Shen Wb, Remington M, Fishman PS. Induction of neural differentiation by  
401 the transcription factor NeuroD2. *International Journal of Developmental Neuroscience*.  
402 2012;30(2):105–112. doi:10.1016/j.ijdevneu.2011.12.006.
- 403 [41] Hu M, Krause D, Sharkies S, Dexter M, Heyworth C, Enver T. Multilineage gene expression  
404 preceded commitment in the hemopoietic system. *Genes and Development*. 1997;11:774–785.  
405 doi:10.1101/gad.11.6.774.
- 406 [42] Enver T, Heyworth CM, Dexter TM. Do Stem Cells Play Dice? *blood*. 1998;.
- 407 [43] Haas S, Trumpp A, Milsom MD. Causes and Consequences of Hematopoietic Stem Cell  
408 Heterogeneity. *Cell Stem Cell*. 2018;22(5):627–638. doi:10.1016/j.stem.2018.04.003.
- 409 [44] Chaker Z, Codega P, Doetsch F. A mosaic world: puzzles revealed by adult neural stem cell  
410 heterogeneity. *Wiley Interdisciplinary Reviews: Developmental Biology*. 2016;5(6):640–658.  
411 doi:10.1002/wdev.248.
- 412 [45] Moore KA. Stem Cells and Their Niches. *Science*. 2006;311(5769):1880–1885.  
413 doi:10.1126/science.1110542.
- 414 [46] Buszczak M, Signer RAJ, Morrison SJ. Cellular differences in protein synthesis regulate tissue  
415 homeostasis. *Cell*. 2014;159(2):242–251. doi:10.1016/j.cell.2014.09.016.

## 416 A Appendix

### 417 A.1 Average stem cell population dynamics

418 We studied the average stem cell population dynamics, assuming constant average stem cell prop-  
 419 erties  $\epsilon = \langle \epsilon_k \rangle_k$ ,  $\alpha = \langle \alpha_k \rangle_k$  for any time. Equation (4) then becomes

$$\frac{dB}{dt} = [\epsilon \cdot (1 - 2\alpha)]B(t) \quad (8)$$

420 with the solution

$$B(t) = B_0 \cdot e^{[\epsilon \cdot (1 - 2\alpha)]t}. \quad (9)$$

421 We characterized the evolution of a stem cell population by bringing the initial population size  
 422  $B_0$  in relation to the final population size  $B_{t_{end}}$ :

$$\rho_B = \frac{B_{t_{end}}}{B_0}. \quad (10)$$

423 There are three possible scenarios for the evolution of a stem cell population over time: it can be  
 424 constant in size ( $\rho_B = 1$ ), grow ( $\rho_B > 1$ ) or shrink ( $\rho_B < 1$ ), where the two latter cases occur under  
 425 non-homeostatic conditions (Figure A.1). We analyzed the non-homeostatic cases and found that  
 426 even a minimal deviation from the homeostatic cell cycle and differentiation activity leads to a  
 427 vast change in the stem cell population size within the time of two average cell cycles ( $t_{end} = 40h$ ).  
 428 Both, overgrowth and depletion, become stronger with an increasing average cell cycle activity  
 429  $\langle \epsilon_k \rangle_k$ .

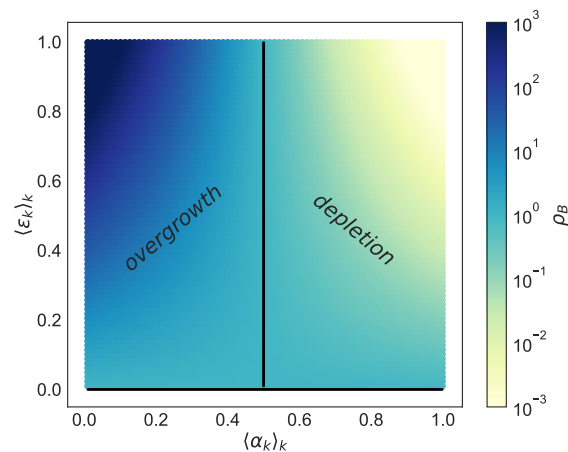

Figure A.1: Average stem cell population dynamics for the homeostatic cases (black lines) and the non-homeostatic cases for  $t_{end} = 40h$ .

430

## A.2 Exemplary distributions of stem cell probabilities

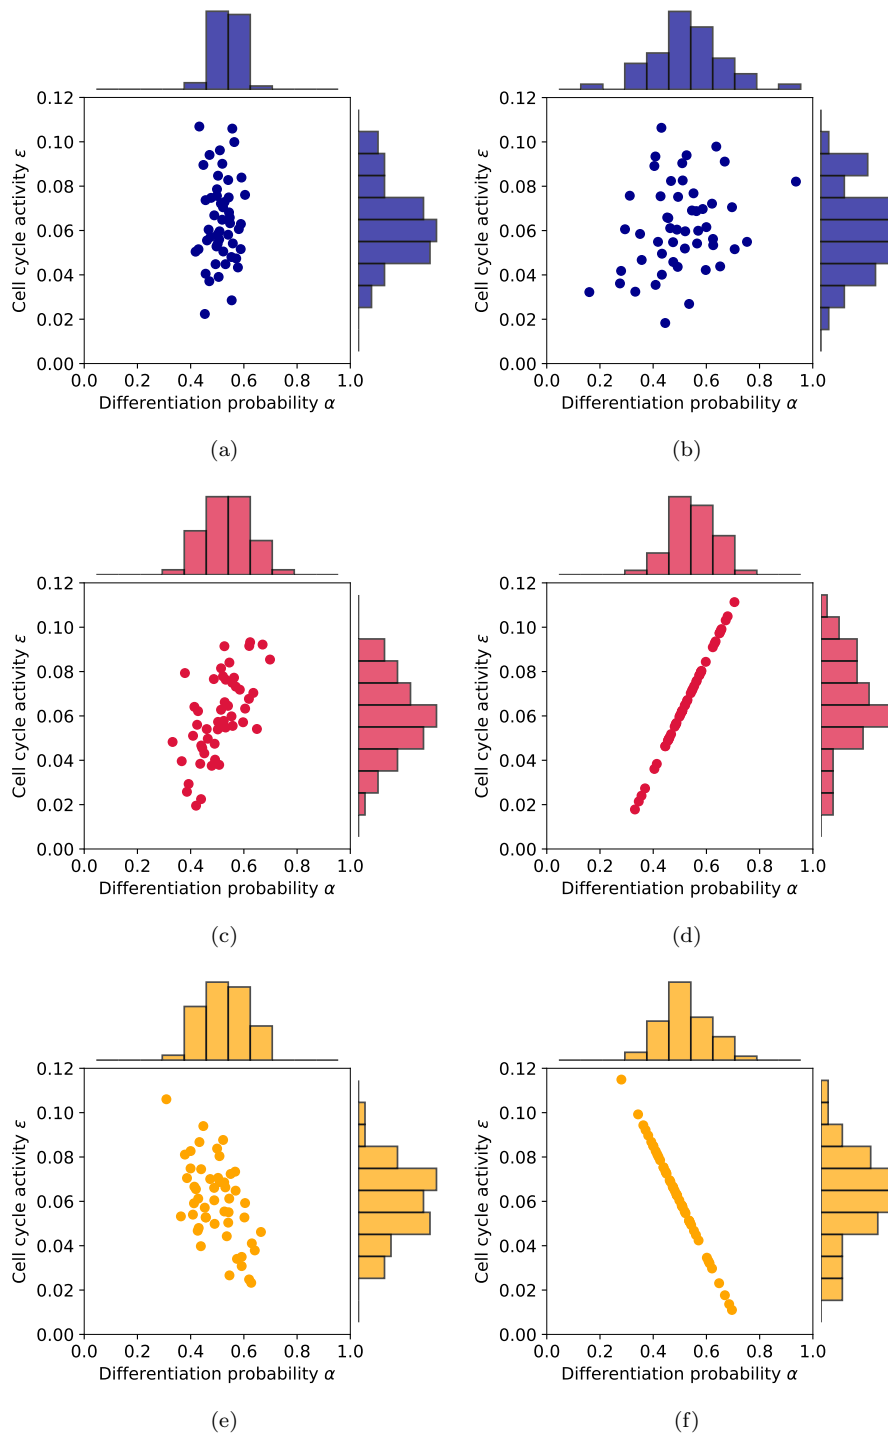

Figure A.2: (a) *Uncoupled probabilities with  $\sigma_\alpha = 0.04, c = 0$ .* (b) *Uncoupled probabilities with  $\sigma_\alpha = 0.12, c = 0$ .* (c) *Coupled probabilities with  $\sigma_\alpha = 0.08, c = 0.5$ .* (d) *Coupled probabilities with  $\sigma_\alpha = 0.08, c = 1.0$ .* (e) *Coupled probabilities with  $\sigma_\alpha = 0.08, c = -0.5$ .* (f) *Coupled probabilities with  $\sigma_\alpha = 0.08, c = -1.0$ .*



### 431 A.3 Subpopulation in single-cell RNA-Seq data of adult murine NSCs

432 Here, we analyzed the subpopulation of cells that do have non-zero expression levels in both gene  
433 marker sets. For this analysis, we excluded cycling cells that do not express differentiation markers  
434 and cells that do express differentiation markers without cell cycle activity. The results show, that  
435 also for this subpopulation there is a positive correlation between cell cycle and differentiation in  
436 the adult (Figure A.3).

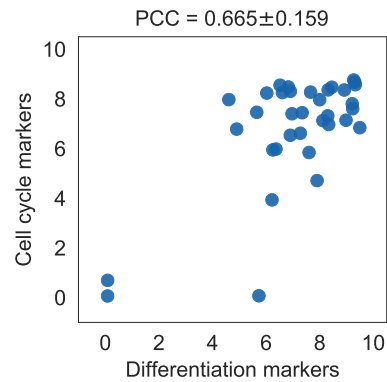

Figure A.3: *Cell cycle marker expression levels against cell differentiation marker expression levels of those adult mouse NSCs [36], that express both, cell cycle and differentiation markers.*
